# Supplementary material for: A novel isocyanide based three component reactionElectronic Supplementary Information (ESI) available: experimental and spectroscopic data. See http://www.rsc.org/suppdata/cc/b3/b310962c/
Source: Royal Society of Chemistry journal article supplement (doi:10.1039/b310962c), 2003-01-01
Supplement: b310962c.doc [file b310962c.doc]

**Supplementary Material for ‘*A Novel Isocyanide based Three Component Reaction’***

All reactions were carried out in flame dried glassware under an inert atmosphere of nitrogen.

*General Experimental Procedure:*

A solution of the epoxide or aziridine (1 mmol) in THF (10 ml) was treated with lithiumtriflate (1 mmol), the isocyanide (1 mmol) and finally the carboxylic acid (1 mmol) [or water in the case of the -hydroxyamides] in succession. The reaction mixture was then heated to reflux for 3 hours. The reaction was allowed to cool to room temperature and was then washed with brine. The organics were extracted with diethylether, dried over Na2SO4, filtered and the solvents removed under reduced pressure. The resulting crude mixture was purified by column chromatography to afford the desired three-component product in the yields stated.

Spectroscopic data for representative compounds:

1H-NMR 400MHz (CDCl3): 7.29 (5H, m, Ar-*H*), 6.33 (1 H, s, N-*H*), 4.15 (1 H, m, PhC-*H*), 3.63 (1 H, br, O-H), 3.12 (1 H, dd, (OH)CH*H*), 2.90 (1 H, dd, (OH)CH*H*), 1.28 (9H, s, C*H3*)

13C-NMR (CDCl3): 172.5, 137.6, 130.1, 128.8, 127.1, 73.7, 51.2, 41.3, 28.9, 21.3,14.5

FTIR (neat)  (cm-1): 3296, 2927, 2870, 1741, 1674, 1503, 1455, 1366

MS (EI) 222 (100%, M+1), 203 (80%), 188 (20%), 146 (15%), 131 (20%), 121 (50%), 103 (20%), 91 (25%), 74 (10%), 57 (75%), 41 (10%)

HRMS: 222.14908 (required: 222.14939, M+H)

1H-NMR 300MHz (CDCl3): 7.24 (5H, m, Ar-*H*), 5.68 (1H, s, N-*H*), 5.28 (1H, tr, PhC-*H*), 3.15 (2H, m, C*H2*), 2.56 (2H, m, C*H2*), 2.47 (2H, m, C*H2*), 2.03 (2H, s, C*H*), 1.31 (9H, s, C*H3*)

13C-NMR (CDCl3): 170.1, 167.7, 137.6, 131.8, 129.6, 128.3, 74.7, 69.5, 60.3, 51.2, 37.6, 33.3, 28.5, 14.2

FTIR (neat)  (cm-1): 3301, 3027, 2924, 1739, 1670, 1544

MS (EI) 302 (5%, M+1), 203 (100%), 188 (30%), 131 (50%), 81 (80%), 53 (60

HRMS: 302.17520 (required 302.17560, M+1)
